# Supplementary material
Source: Research Square preprint supplement (doi:10.21203/rs.3.rs-8661165/v1)
Supplement: Supplementary file 1 [file d0c79be281b0d1e21b036c69.docx]

**Additional File 1**

Questionnaire used to evaluate participants’ perceptions of the 3D-printed simulator before and after the training session. The instrument consisted of items on a 5-point Likert scale (1 = strongly disagree to 5 = strongly agree) and open-ended questions. The original version was written in French; an English translation is provided here for reference. The questionnaire was not formally validated. Open-ended answers were not included in the quantitative analysis.

The questionnaire consisted of two parts. Part I was administered prior to the practical session and evaluated the self-perceived knowledge, skills, and confidence of students in endodontic microsurgery. Part II, which was completed after the session, assessed the perceived realism of the simulator, the students’ progression, overall satisfaction, and views on the educational value of the model.

**Part I: Before the practical session**

I consider my level in endodontic surgery:

 At the theoretical level: (1 = I do not know what it is / 5 = I am an expert in this field)

 At the practical level: (1 = I have never seen one / 5 = I already perform them independently)

Do you feel capable of performing endodontic surgery? (1 = not at all/5 = yes, confidently)

 Independently

 With supervision by a senior practitioner

**Part II: After the practical session**

The following section concerns the perceived realism of the model compared to your clinical experience (1 = not realistic at all / 5 = very realistic):

 Gingiva:

o Visual appearance

o Tactile sensation during incision and flap elevation

 Bone:

o Visual appearance

o Tactile sensation (e.g., hardness during osteotomy)

 Granulation tissue:

o Visual appearance

o Tactile sensation during curettage

 Tooth:

o Visual appearance

o Tactile sensation (e.g., hardness during resection)

 Obturated canal:

o Visual appearance

o Tactile sensation during desobturation

 Sutures: Perception of suturing

 Overall:

o Visual appearance

o Tactile sensations

 Model volume:

Regarding your progress after this practical session (1 = no progress / 5 = significant progress):

 In my theoretical knowledge:

 In my practical skills:

After this practical session, do you feel capable of performing endodontic surgery? (1 = not at all / 5 = yes, confidently):

 Independently

 With supervision by a senior practitioner

Regarding the practical session as a whole (1 = very dissatisfied / 5 = very satisfied):

Regarding the supervision during this practical session (1 = very dissatisfied / 5 = very satisfied):

The tested simulator is a reliable tool for learning endodontic surgery as a whole (1 = strongly disagree / 5 = strongly agree):

If you had benefited from this simulator during your studies, would it have been an asset to your training? (1 = strongly disagree / 5 = strongly agree):
